# Supplementary material for: Lattice distortion of CaF2 nanocrystals for shortening their 19F longitude relaxation time
Source: Royal Society of Chemistry journal article supplement (doi:10.1039/d1cc02448e), 2021-01-01
Supplement: d1cc02448e1.pdf [file d1cc02448e1.pdf]

**Electronic Supplementary Information  
for**

**Lattice distortion of CaF<sub>2</sub> nanocrystals for shortening their <sup>19</sup>F  
longitude relaxation time**

Ran Xu,<sup>a</sup> Fanqiang Meng,<sup>a</sup> Yanyue Liu,<sup>a</sup> Dida Duosiken,<sup>a</sup> Kang Sun,<sup>a</sup> Sijian Pan,<sup>\*b</sup> and  
Ke Tao<sup>\*a</sup>

*a. State Key Lab of Metal Matrix Composites, School of Materials Science and  
Engineering, Shanghai Jiao Tong University, Shanghai 200240, P. R. China.*

*b. Department of Neurosurgery, Rui-Jin Hospital, Shanghai Jiao Tong University  
School of Medicine, Shanghai 200025, P.R.China.*

*\*Corresponding Author: S. Pan: psj11629@rjh.com.cn; K. Tao: ktao@sjtu.edu.cn, 86-  
21-3420-2956*

---

## 1. Experimental Section

### *Materials*

Calcium oxide (CaO, 98%) was purchased from Adamas Reagent Co., Ltd. Trifluoroacetic acid (TFA, 99.50%), oleic acid (OA, 90%), oleylamine (OM, 90%) and 1-octadecene (1-ODE) were purchased from Shanghai Aladdin Bio-Chem Technology Co., LTD. Ethanol (C<sub>2</sub>H<sub>5</sub>OH, 99.70%), n-hexane (99.70%) and cyclohexane (99.70%) were obtained from Sinopharm Chemical Reagent Co., Ltd. Deuterated chloroform (99.80%) was purchased from Sigma-Aldrich Co., Ltd.

### *The Synthesis*

The precursor, Ca(CF<sub>3</sub>COO)<sub>2</sub>, was prepared by dissolving calcium oxide (20mmol) in CF<sub>3</sub>COOH/water (vol. 1:1) solutions in a 50 ml single-necked flask. The reaction system was stirred at 110°C under vacuum for about 1h until the mixture became clear.

A typical procedure of the synthesis of CaF<sub>2</sub> nanocrystals was conducted as follows: Ca(CF<sub>3</sub>COO)<sub>2</sub> (4mmol) was added into 80 ml of OA/OM/1-ODE mixture in a three-necked flask (150 mL) at room temperature. Then, the system was heated to 100 °C to remove water and oxygen with vigorous magnetic stirring under vacuum for 1h to form an optically transparent solution. The solution was then heated to 310 °C at a heating rate of 10 °C/min and kept for 1 h under an inert N<sub>2</sub> atmosphere. Once cooling to room temperature, the nanocrystals were washed with anhydrous ethanol and cyclohexane for three times. The collected nanoparticles were finally dispersed in cyclohexane for further use. The ratio between OA, OM and ODE, and the reaction time were specified in the manuscript.

### *Characterization*

The size and morphology of the nanocrystals were observed with a Tecnai G2 Spirit Biotwin biology transmission electron microscope (Bio-TEM), and a TALOS F200X transmission electron microscope (HR-TEM) operated at 200 kV. Polydispersity index (PDI) of nanoparticles was conducted using dynamic light scattering (DLS) (Malvern Zetasizer Nano S) using a 4 mW He–Ne laser operating at 633 nm.

The impurities of the samples were determined by inductively coupled plasma (Thermo iCAP 6300). The transition elements contained in the nanoparticles were

---

qualitatively and semi-quantitatively characterized.

Nuclear magnetic resonance (NMR) experiments were performed on a Avance III 400MHz Nuclear Magnetic Resonance Spectrometer. The samples (1mM, 1ml) were sonicated for 3 min and then transferred into the NMR tube to detect the relaxation time of  $^{19}\text{F}$ . The longitudinal (T1) and transverse (T2) relaxation times were calculated using inversion recovery (IR) and rotation inversion method experiments, respectively.

$^{19}\text{F}$  magic angle spinning (MAS) NMR spectra were collected at a Larmor frequency of 600.13 MHz (14.09 T) using a Bruker Avance NEO 600 MHz WB Solid-State Nuclear Magnetic Resonance Spectrometer. The freeze-dried samples were rotated at 33kHz at ambient temperature.<sup>1</sup>

The samples with 1mM concentration (or the concentration specified in the manuscript) were added into 5 ml bottles and sonicated for 3 min to ensure the solution well dispersed.  $^{19}\text{F}$ -Magnetic Resonance Imaging (MRI) were performed on a Bruker ClinScan 7T MRI. A dual  $^1\text{H}/^{19}\text{F}$ , 25 mm RF coil was used to acquire the  $^{19}\text{F}$ -MR images with FLASH sequence. Parameters were used as follows: TR/TE=500/1.26 ms, FOV=80×50 mm<sup>2</sup>, matrix size=32×32, scan time of 17.06 min. All  $^{19}\text{F}$  spectra were acquired for 1024s for each sample, 8 times.

Figure S1.

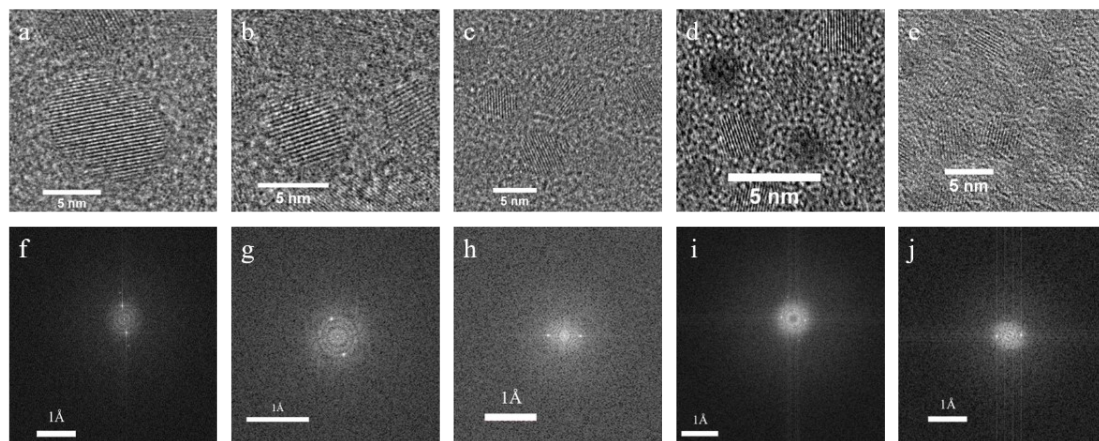

Figure S1. HR-TEM images (a-e) and their corresponding FFT diffraction points (f-j) for sample 1, 7, 6, 2, and 5, respectively.

---

Figure S2.

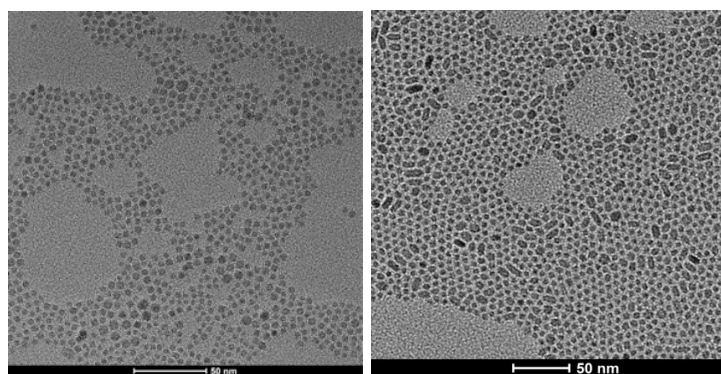

(a)

(b)

Figure S2. TEM images of a) sample 2' and b) 5'

---

Figure S3.

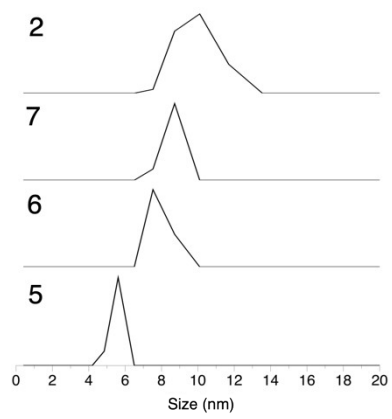

Figure S3. The size of nanocrystals measured by DLS.

Table S1. The synthesis conditions and the outcome of nanocrystals

| No. | OA : OM : ODE        | Size (nm) | DPI (%) | Lattice parameter (Å) | FWHM from NMR (Hz) |
|-----|----------------------|-----------|---------|-----------------------|--------------------|
| 1#  | 0.5 : 0.125 : 0.375  | 14.2*8.6  | 24      | 5.57                  | 360.8              |
| 2#  | 0.5 : 0.25 : 0.25    | 7.1       | 21      | 5.42                  | 449.6              |
| 3#  | 0.75 : 0.25 : 0      | 6.1       | 46      | /                     | /                  |
| 4#  | 0.625 : 0.375 : 0    | 4.5       | 12      | /                     | /                  |
| 5#  | 0.5 : 0.5 : 0        | 3.9       | 8       | 5.30                  | 1420.8             |
| 6#  | 0.375 : 0.625 : 0    | 4.2       | 7       | 5.51                  | 274.8              |
| 7#  | 0.25 : 0.75 : 0      | 5.1       | 10      | 5.53                  | 309.6              |
| 8#  | 0.375 : 0.5 : 0.125  | 4.2       | 8       | 5.52                  | 244.4              |
| 9#  | 0.375 : 0.25 : 0.375 | 4.5       | 9       | 5.53                  | 262.8              |
| 10# | 0.25 : 0.25 : 0.5    | 12.6      | 42      | /                     | /                  |

---

Table S2. The correlation between sample Nos., lattice parameters, and their MRI imaging properties.

| No. | Lattice parameter (Å) | T1(s)     | T2(ms)   | SNR    |
|-----|-----------------------|-----------|----------|--------|
| 1#  | 5.57                  | 20.9±1.24 | 2.0±0.20 | 77.19  |
| 2#  | 5.42                  | 11.4±0.66 | 1.6±0.05 | 195.56 |
| 5#  | 5.30                  | 2.1±0.20  | 1.3±0.03 | 220.64 |
| 6#  | 5.51                  | 15.1±0.03 | 1.6±0.50 | 117.57 |
| 7#  | 5.53                  | 16.3±0.29 | 1.8±0.16 | 112.85 |
| 8#  | 5.52                  | 16.0±0.30 | 1.8±0.14 | /      |
| 9#  | 5.53                  | 14.6±0.36 | 1.7±0.31 | /      |



---

Table S3. The detectable impurities of transition metals in Sample 5

| Transition element | Average content (%) | Transition element | Average content (%) |
|--------------------|---------------------|--------------------|---------------------|
| Ti                 | 0.0027              | Co                 | 0.0014              |
| V                  | 0.0006              | Ni                 | 0.0009              |
| Cr                 | 0.0003              | Zr                 | 0.0088              |
| Mn                 | 0.0017              | Mo                 | 0.0002              |
| Fe                 | 0.0080              | W                  | 0.0011              |

---

Table S4. The detectable impurities of transition metals in Sample 6.

| Transition element | Average content (%) | Transition element | Average content (%) |
|--------------------|---------------------|--------------------|---------------------|
| Ti                 | 0.0029              | Co                 | 0.0003              |
| V                  | 0.0004              | Ni                 | 0.0008              |
| Cr                 | 0.0005              | Zr                 | 0.0095              |
| Mn                 | 0.0002              | Mo                 | 0.0002              |
| Fe                 | 0.0028              | W                  | 0.0006              |
| Nb                 | 0.0001              |                    |                     |

---
